# Supplementary material for: Buzz-Pollinated Crops: A Global Review and Meta-analysis of the Effects of Supplemental Bee Pollination in Tomato
Source: PubMed Central journal article supplement (PMC8042731; doi:10.1093/jee/toab009), 2021-02-22

## Buzz-Pollinated Crops: A Global Review and Meta-analysis of the Effects of Supplemental Bee Pollination in Tomato

Hazel Cooley & Vallejo-Marin  
Journal of Economic Entomology

**Figure S1.** Effect of supplemental pollination on tomato fruit weight relative to a no-pollination control. MV = Mechanical vibration. Non-buzzing bees: *Apis*, *Nannotrigona*, *Trigona*. Buzzing bees: *Amegilla*, *Augochloropsis*, *Bombus*, *Exomalopsis*, *Hoplonomia*, *Melipona*.

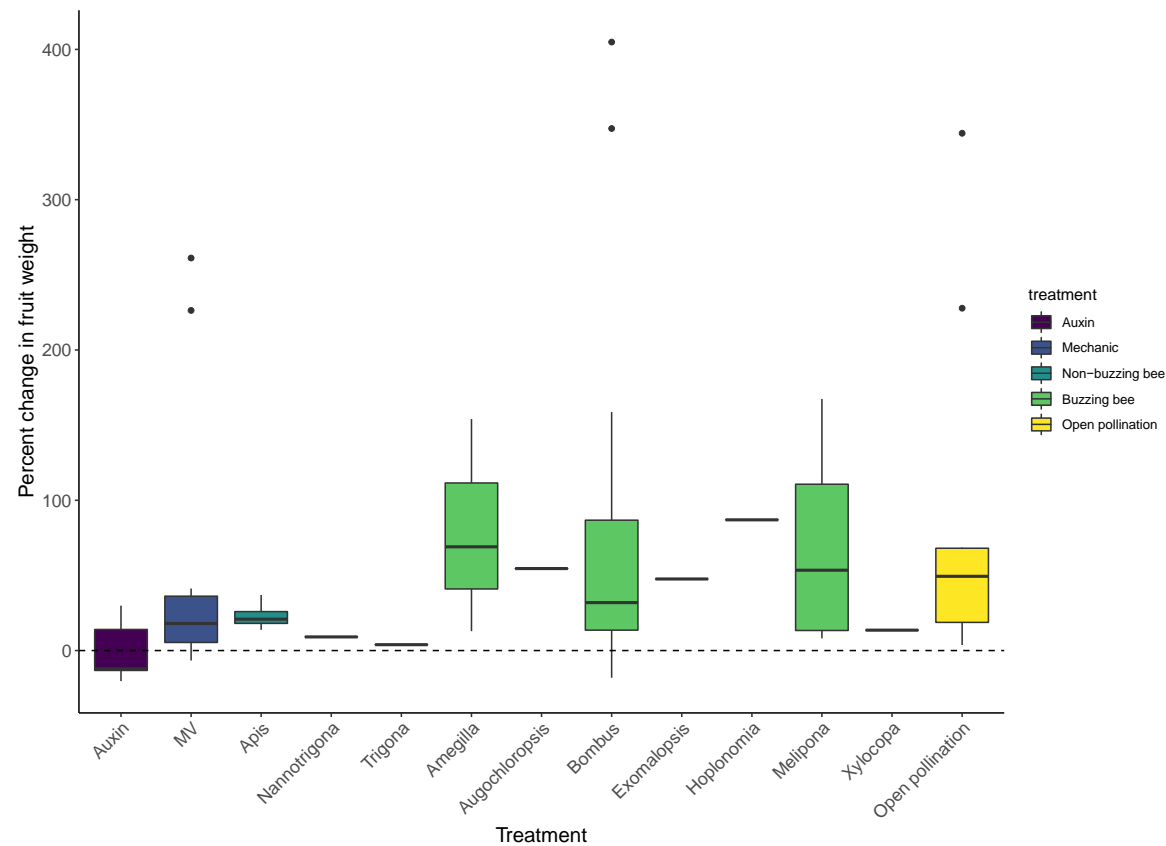

Supplement: toab009_suppl_supplementary_figure_s1.pdf [file toab009_suppl_supplementary_figure_s1.pdf]
