# Supplementary material for: Buzz-Pollinated Crops: A Global Review and Meta-analysis of the Effects of Supplemental Bee Pollination in Tomato
Source: PubMed Central journal article supplement (PMC8042731; doi:10.1093/jee/toab009), 2021-02-22
Supplement: toab009_suppl_supplementary_table_s1.pdf [file toab009_suppl_supplementary_table_s1.pdf]

## Buzz-Pollinated Crops: A Global Review and Meta-analysis of the Effects of Supplemental Bee Pollination in Tomato

Hazel Cooley & Vallejo-Marin  
Journal of Economic Entomology

**Table S1.** Full list of 73 experiments and 24 studies included arranged by percentage change in fruit weight relative to a no-pollination control (% Change in fruit weight). ID = Experiment number. For full references see the Reference section in the article's main text. Studies included in the meta-analysis are indicated with \*.

| ID | Study                                       | Cultivation type | Location  | Tomato variety | Treatment        | % Change in fruit weight |
|----|---------------------------------------------|------------------|-----------|----------------|------------------|--------------------------|
| 1  | Martin-Closas Puigdomenech & Pelacho 2007   | Greenhouse       | Spain     | Bond           | Auxin            | -20.281                  |
| 2  | Strange 2015                                | Greenhouse       | USA       | Sungold        | Buzzing bee      | -18.074                  |
| 3  | Martin-Closas Puigdomenech & Pelacho 2007   | Greenhouse       | Spain     | Bond           | Buzzing bee      | -17.791                  |
| 4  | Martin-Closas Puigdomenech & Pelacho 2007   | Greenhouse       | Spain     | Bond           | Auxin            | -13.201                  |
| 5  | Salvarrey et al. 2020                       | Greenhouse       | Uruguay   | Elipida        | Auxin            | -12.172                  |
| 6  | Martin-Closas Puigdomenech & Pelacho 2007   | Greenhouse       | Spain     | Bond           | Buzzing bee      | -6.983                   |
| 7  | Martin-Closas Puigdomenech & Pelacho 2007   | Greenhouse       | Spain     | Bond           | Mechanic         | -6.667                   |
| 8  | Martin-Closas Puigdomenech & Pelacho 2007   | Greenhouse       | Spain     | Bond           | Mechanic         | -6.320                   |
| 9  | Vergara & Fieldonseca-Buendia 2012*         | Greenhouse       | Mexico    | NA             | Mechanic         | 2.841                    |
| 10 | Gaglianone et al. n.d.                      | NA               | Brazil    | Salada         | Open pollination | 3.661                    |
| 11 | Putra & Kinasih 2014                        | Field            | Indonesia | NA             | Non-buzzing bee  | 3.939                    |
| 12 | Gaglianone et al. n.d.                      | NA               | Brazil    | Cherry         | Open pollination | 4.167                    |
| 13 | Vergara & Fieldonseca-Buendia 2012*         | Greenhouse       | Mexico    | NA             | Mechanic         | 5.405                    |
| 14 | Dogterom Matteoni & PlowriGreenhouset 1998* | Greenhouse       | Canada    | BeeFieldsteak  | Mechanic         | 6.137                    |
| 15 | Strange 2015                                | Greenhouse       | USA       | Fieldavorita   | Buzzing bee      | 6.419                    |

Table S1  
Cooley & Vallejo-Marin

|    |                                                         |            |           |                                      |                  |        |
|----|---------------------------------------------------------|------------|-----------|--------------------------------------|------------------|--------|
| 16 | Silva-Neto et al. 2019                                  | Greenhouse | Brazil    | Santa Cruz                           | Buzzing bee      | 8.119  |
| 17 | Cauch et al. 2004                                       | Greenhouse | Mexico    | Maya                                 | Non-buzzing bee  | 9.076  |
| 18 | Vergara & Fieldonseca-Buendia 2012*                     | Greenhouse | Mexico    | NA                                   | Buzzing bee      | 10.187 |
| 19 | Bell Spooner-hart & HaiGreenhouse 2006*                 | Greenhouse | Australia | NA                                   | Buzzing bee      | 12.911 |
| 20 | Cauch et al. 2004                                       | Greenhouse | Mexico    | Maya                                 | Mechanic         | 12.966 |
| 21 | Strange 2015                                            | Greenhouse | USA       | Sungold & Fieldavorita Cherry Tomato | Buzzing bee      | 13.303 |
| 22 | Hogendoorn Steen & Schwarz 2008*                        | Field      | Australia | Grosselissi                          | Buzzing bee      | 13.559 |
| 23 | Strange 2015                                            | Greenhouse | USA       | Sungold & Fieldavorita Cherry Tomato | Buzzing bee      | 13.660 |
| 24 | Putra & Kinasih 2014                                    | Field      | Indonesia | NA                                   | Non-buzzing bee  | 13.826 |
| 25 | Nazer Kasrawi & Al-Attal 2003                           | Greenhouse | Jordan    | NA                                   | Auxin            | 14.023 |
| 26 | Silva-Neto et al. 2019                                  | Greenhouse | Brazil    | AP533 hybrid                         | Buzzing bee      | 15.109 |
| 27 | Bell Spooner-hart & HaiGreenhouse 2006*                 | Greenhouse | Australia | NA                                   | Mechanic         | 18.043 |
| 28 | Kasina 2007*                                            | Field      | Kenya     | NA                                   | Open pollination | 18.085 |
| 29 | Strange 2015                                            | Greenhouse | USA       | Sungold & Fieldavorita Cherry Tomato | Buzzing bee      | 18.297 |
| 30 | Gaglianone et al. n.d.                                  | NA         | Brazil    | Aguamiel                             | Open pollination | 19.004 |
| 31 | Nazer Kasrawi & Al-Attal 2003                           | Greenhouse | Jordan    | NA                                   | Mechanic         | 19.122 |
| 32 | Strange 2015                                            | Greenhouse | USA       | Sungold                              | Buzzing bee      | 19.200 |
| 33 | Banda & Paxton 1991*                                    | Greenhouse | England   | BeeFieldsteak                        | Non-buzzing bee  | 19.539 |
| 34 | Macias-Macias Chuc Ancona-Xiu Cauch & Quezada-Eua 2009* | Field      | Mexico    | Saladette                            | Non-buzzing bee  | 22.193 |
| 35 | Gaglianone et al. n.d.                                  | NA         | Brazil    | Chipano                              | Open pollination | 23.077 |

Table S1  
Cooley & Vallejo-Marin

|    |                                                             |            |           |                 |                     |        |
|----|-------------------------------------------------------------|------------|-----------|-----------------|---------------------|--------|
| 36 | Salvarrey et al. 2020                                       | Greenhouse | Uruguay   | Lapataia        | Buzzing bee         | 23.844 |
| 37 | Dogterom Matteoni & PlowriGreenhouset 1998*                 | Greenhouse | Canada    | BeeFieldsteak   | Buzzing bee         | 25.684 |
| 38 | Strange 2015                                                | Greenhouse | USA       | Fieldavorita    | Buzzing bee         | 26.091 |
| 39 | Salvarrey et al. 2020                                       | Greenhouse | Uruguay   | Elipida         | Auxin               | 29.874 |
| 40 | Banda & Paxton 1991*                                        | Greenhouse | England   | BeeFieldsteak   | Mechanic            | 30.500 |
| 41 | Hogendoorn 2006*                                            | Greenhouse | Australia | NA              | Mechanic            | 36.163 |
| 42 | Banda & Paxton 1991*                                        | Greenhouse | England   | BeeFieldsteak   | Non-buzzing<br>bee  | 37.010 |
| 43 | Salvarrey et al. 2020                                       | Greenhouse | Uruguay   | Elipida         | Buzzing bee         | 37.736 |
| 44 | Cure and Rodriguez 2007                                     | Greenhouse | Colombia  | Durinta         | Buzzing bee         | 40.900 |
| 45 | Banda & Paxton 1991*                                        | Greenhouse | England   | BeeFieldsteak   | Mechanic            | 41.277 |
| 46 | Salvarrey et al. 2020                                       | Greenhouse | Uruguay   | Elipida         | Buzzing bee         | 41.331 |
| 47 | Nazer Kasrawi & Al-Attal 2003                               | Greenhouse | Jordan    | NA              | Buzzing bee         | 42.068 |
| 48 | Macias-Macias Chuc Ancona-Xiu Cauich & Quezada-Eua<br>2009* | Field      | Mexico    | Saladette       | Buzzing bee         | 47.594 |
| 49 | Gaglianone et al. n.d.                                      | NA         | Brazil    | Sweet gold      | Open<br>pollination | 48.551 |
| 50 | Fieldranceschinelli et al. 2013                             | Field      | Brazil    | Italian         | Open<br>pollination | 50.212 |
| 51 | Gaglianone et al. n.d.                                      | NA         | Brazil    | Italian         | Open<br>pollination | 50.212 |
| 52 | Macias-Macias Chuc Ancona-Xiu Cauich & Quezada-Eua<br>2009* | Field      | Mexico    | Saladette       | Buzzing bee         | 54.545 |
| 53 | Banda & Paxton 1991*                                        | Greenhouse | England   | BeeFieldsteak   | Buzzing bee         | 62.612 |
| 54 | Macias-Macias Chuc Ancona-Xiu Cauich & Quezada-Eua<br>2009* | Field      | Mexico    | Saladette       | Open<br>pollination | 67.914 |
| 55 | Gaglianone et al. n.d.                                      | NA         | Brazil    | Sophia          | Open<br>pollination | 68.541 |
| 56 | Hogendoorn 2006*                                            | Greenhouse | Australia | NA              | Buzzing bee         | 69.019 |
| 57 | Banda & Paxton 1991*                                        | Greenhouse | England   | BeeFieldsteak   | Buzzing bee         | 86.458 |
| 58 | Amala & Shivalingaswamy 2017                                | Field      | India     | S. lycopersicum | Buzzing bee         | 87.017 |
| 59 | Hikawa & Miyanaga 2009                                      | Greenhouse | Japan     | NA              | Buzzing bee         | 87.629 |

Table S1  
Cooley & Vallejo-Marin

|    |                              |            |          |                        |                     |         |
|----|------------------------------|------------|----------|------------------------|---------------------|---------|
| 60 | Hikawa & Miyanaga 2009       | Greenhouse | Japan    | NA                     | Buzzing bee         | 91.753  |
| 61 | Torres-Ruiz & Jones 2013*    | Greenhouse | Mexico   | Tricia                 | Buzzing bee         | 96.039  |
| 62 | Torres-Ruiz & Jones 2013*    | Greenhouse | Mexico   | Tricia                 | Buzzing bee         | 106.780 |
| 63 | Amala & Shivalingaswamy 2017 | Field      | India    | <i>S. lycopersicum</i> | Buzzing bee         | 154.042 |
| 64 | Hikawa & Miyanaga 2009       | Greenhouse | Japan    | NA                     | Buzzing bee         | 158.696 |
| 65 | Hikawa & Miyanaga 2009       | Greenhouse | Japan    | NA                     | Buzzing bee         | 167.391 |
| 66 | Ahmad et al. 2015            | Greenhouse | Pakistan | Cherry                 | Mechanic            | 226.316 |
| 67 | Vinicius-Silva et al. 2017*  | Field      | Brazil   | NA                     | Open<br>pollination | 227.777 |
| 68 | Ahmad et al. 2015            | Greenhouse | Pakistan | Grandella              | Mechanic            | 261.165 |
| 69 | Vinicius-Silva et al. 2017*  | Field      | Brazil   | NA                     | Open<br>pollination | 344.223 |
| 70 | Ahmad et al. 2015            | Greenhouse | Pakistan | Cherry                 | Buzzing bee         | 347.368 |
| 71 | Ahmad et al. 2015            | Greenhouse | Pakistan | Grandella              | Buzzing bee         | 404.854 |
| 72 | Hikawa & Miyanaga 2009       | Greenhouse | Japan    | NA                     | Buzzing bee         | 783.333 |
| 73 | Hikawa & Miyanaga 2009       | Greenhouse | Japan    | NA                     | Buzzing bee         | 900.000 |
